# Supplementary material for: The Extratropical Northern Hemisphere Temperature Reconstruction during the Last Millennium Based on a Novel Method
Source: PubMed Central journal article supplement (PMC4709040; doi:10.1371/journal.pone.0146776), 2016-01-11
Supplement: pone.0146776.s002.pdf [file pone.0146776.s002.pdf]

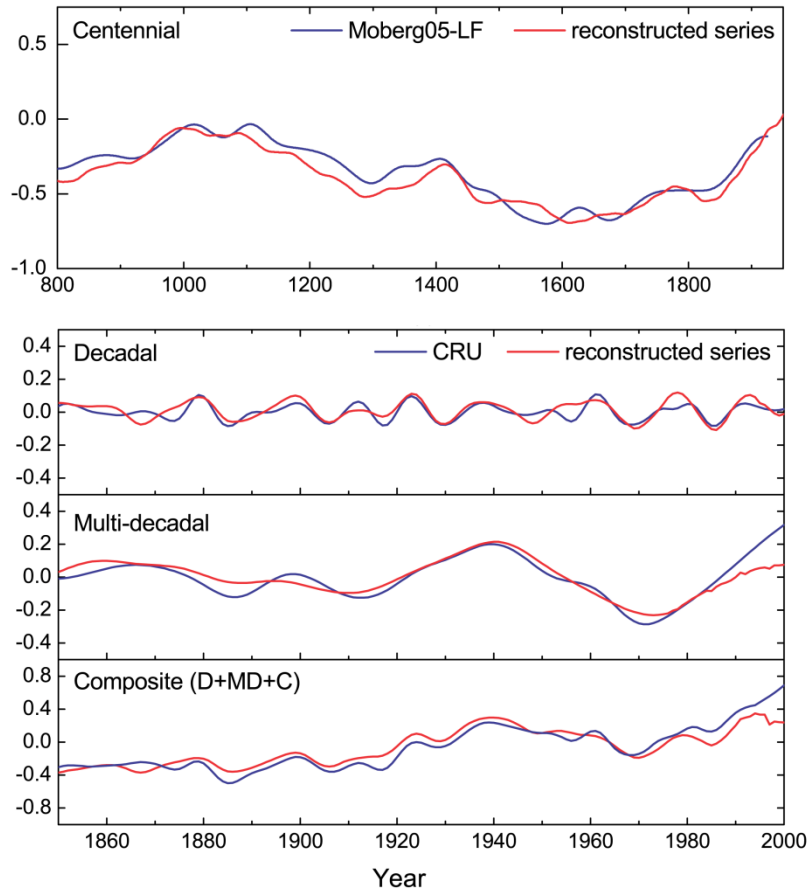

**S1 Fig. Comparison between the benchmark series (i.e. instrumental CRU variation and low-frequency variability obtained from reference [8]) and the reconstructed series based on tree-ring data by MDVM method on different timescales. The common period for decadal, multi-decadal and composite series spanned in 1850-2000 AD, whereas the period for centennial series spanned in 800-1925 AD.**
