# Supplementary material for: The Extratropical Northern Hemisphere Temperature Reconstruction during the Last Millennium Based on a Novel Method
Source: PubMed Central journal article supplement (PMC4709040; doi:10.1371/journal.pone.0146776), 2016-01-11
Supplement: pone.0146776.s003.pdf [file pone.0146776.s003.pdf]

**S1 Table. Mean of threshold values for each tree-ring component on decadal, multi-decadal and centennial scale, estimated by Monte Carlo simulation (5000 trials, Bootstrap resampling 400 times, at 95% level of confidence).**

|                              | Decadal | Multi-decadal | Centennial                                 |
|------------------------------|---------|---------------|--------------------------------------------|
| Benchmark for correlation    | CRU     | CRU           | low-frequency variation<br>(reference [8]) |
| Mean of the threshold values | 0.258   | 0.476         | 0.403                                      |
